1 **Measuring G Protein Activation with Spectrally Resolved Fluorescence Fluctuation Spectroscopy**

2

3 **Authors:** Daniel J. Foust<sup>1,2</sup>, \*David W. Piston<sup>1</sup>

4 1. Department of Cell Biology and Physiology, Washington University in St. Louis. St. Louis, MO, United  
5 States.

6 2. Department of Biomedical Engineering, Washington University in St. Louis. St. Louis, MO, United  
7 States.

8 \*Corresponding Author: piston@wustl.edu

9

## 10 **Abstract**

11 G protein-coupled receptor signaling has been posited to occur through either collision coupling or pre-  
12 assembled complexes with G protein transducers. To investigate the dynamics of G protein signaling,  
13 we introduce fluorescence covariance matrix analysis (FCMA), a novel implementation of fluorescence  
14 cumulant analysis applied to spectrally resolved fluorescence images. We labeled the GPCR,  $G\alpha$ , and  
15  $G\beta\gamma$  units with distinct fluorescent protein labels and we applied FCMA to measure directly the complex  
16 formation during stimulation of dopamine and adrenergic receptors. To determine the prevalence of  
17 hetero-oligomers, we compared the GPCR data to those from control samples expressing three  
18 fluorescent protein labels with known stoichiometries. Interactions between  $G\alpha$  and  $G\beta\gamma$  subunits  
19 determined by FCMA were sensitive to stimulation with GPCR ligands. However, GPCR/G protein  
20 interactions were too weak to be distinguished from background. These findings support a collision  
21 coupling mechanism rather than pre-assembled complexes for the two GPCRs studied.

22

## 23 **Introduction**

24 Fluorescence fluctuation spectroscopy (FFS) is a set of statistical techniques used to extract physical  
25 parameters from fluorescence signals by using physical models of fluorescence detection (1). In  
26 biological applications, the most frequently measured parameters are diffusion coefficients,  
27 concentrations, and the molecular brightness of fluorescently labeled biomolecules (2–4). Imaging-FFS,  
28 by analyzing multidimensional fluorescence images, has become increasingly popular due to its potential  
29 to provide spatially resolved information (5–8). FFS is also used to analyze samples containing multiple  
30 chromophores and provide information about heteromeric molecular interactions (9, 10). Towards  
31 measuring an increasing number of molecular components, multicolor FFS has been expanded to utilize  
32 spectrally resolved detection. In these systems, a prism or diffraction grating is used to redirect photons

33 onto an array of detectors so that the energy of incident photoelectrons is known more precisely than in  
34 systems based on dichroic mirrors and multiple independent detectors (11–13). Recent developments  
35 have paired spectral detection with spectral unmixing techniques for better signal-to-noise ratios (SNRs)  
36 (14–16), and as many as four chromophores have been used simultaneously in live cell experiments (17).

37 G protein coupled receptors (GPCRs) are physiologically vital cell surface receptors (18). Their  
38 downstream effects are predominantly mediated by G proteins (19–21). Trimeric G proteins are  
39 heterocomplexes composed of  $\alpha$ ,  $\beta$ , and  $\gamma$  subunits (22). Together, the  $\beta$  and  $\gamma$  subunits, form a single  
40 functional signaling unit and are not active when unpaired. Canonically, GPCRs catalyze the dissociation  
41 of  $G\alpha\beta\gamma$  into active  $G\alpha$  and  $G\beta\gamma$  signaling units that can participate in downstream signaling events. The  
42 interactions between GPCRs and G proteins have been probed extensively using several fluorescence-  
43 based techniques including resonance energy transfer, bimolecular complementation, single molecule  
44 tracking, polarization, and FFS (23, 24).

45 An outstanding issue in GPCR signaling is the degree to which receptors and G proteins form  
46 stable complexes (25). Collision coupling models posit that GPCRs and G proteins move independently  
47 in the plasma membrane in the absence of stimulating ligands and are limited to transient interactions  
48 (26–28). Pre-assembly models assert that GPCRs and G proteins interact constitutively in stable  
49 complexes (29–31). Kinetic models have been developed to accommodate both signaling mechanisms  
50 (32), but experimental evidence to date has been contradictory regarding which mechanism is dominant  
51 (24). Multicolor FFS approaches are well-suited to address this problem because they enable us to  
52 observe the principal components of GPCR signal transduction simultaneously and in real time.

53 To investigate the mechanisms underlying GPCR activation, we introduce fluorescence  
54 covariance matrix analysis (FCMA), which is a new approach to analyzing spectrally resolved imaging  
55 data that provides detection and quantification of multi-chromic complexes. Additionally, FCMA

56 provides a simple graphical interpretation of complex formation. FCMA is an extension of cumulant-  
57 based approaches applied to spectrally resolved imaging data (8, 33–35). We applied FCMA to 23  
58 channel images of tri-chromic samples expressing permutations of green, yellow, and red fluorescent  
59 protein monomers and dimers expressed on the plasma membrane. Using FCMA, we can detect and  
60 measure trimeric interactions without invoking higher order correlations (17).

61 We applied FCMA to the analysis of G protein signaling mechanisms for two G $\alpha$ i-coupled GPCRs,  
62 DRD2 and ADRA2A, whose exogenous ligands are dopamine and epinephrine, respectively. The G $\alpha$ i  
63 subset of G proteins are involved in the inhibition of cAMP production through interactions with  
64 adenylyl cyclase (36). In co-expression experiments with labeled G $\alpha$ i and G $\beta$  $\gamma$  functional signaling units,  
65 we monitored these three components during the signaling event. The G $\alpha$ /G $\beta$  $\gamma$  interactions were  
66 sensitive to stimulation with GPCR agonists. However, we did not observe ternary interactions between  
67 GPCRs, G $\alpha$ i, and G $\beta$  $\gamma$  units, which is consistent with the absence of pre-assembled complexes.

68

## 69 **Results**

### 70 *Fluorescence Covariance Matrix Analysis of CD86 Controls*

71 To calibrate FCMA as a tool for analyzing samples expressing multiple chromophores, we used the  
72 monomeric plasma membrane protein CD86 as a scaffold for permutations of fluorescent heteromers.  
73 Three fluorescent proteins were used, mEGFP (G), mEYFP (Y), and mCherry2 (R). Three fluorescent  
74 monomers were analyzed, CD86-G, CD86-Y, and CD86-R, as well as five monomer/heteromer  
75 combinations, CD86-G + CD86-Y + CD86-R (three monomers), R-CD86-Y-G (trimer), CD86-Y-G + CD86-R  
76 (GY dimer with R monomer), CD86-G + R-CD86-Y (G monomer with YR dimer), and R-CD86-G + CD86-Y  
77 (GR dimer with Y monomer) (Fig. 1). These combinations were expressed in HEK 293 cells and the  
78 plasma membrane adjacent to the cover glass was imaged using confocal microscopy.

79 Samples containing a single chromophore feature a single peak on the main diagonal of the  
80 covariance matrix (Fig. 1 A-C). The location of this peak matches the position of the maximum signal in  
81 the detection spectrum (Fig. S1 C). When noninteracting species are present in a sample their  
82 contributions to the covariance matrix are additive (Fig. 1 D, F-H). When two chromophores interact  
83 and act as a single species this has a multiplicative effect on their contribution to the covariance matrix.  
84 Interacting chromophores with high spectral overlap produce a broadened peak, as in the case for G and  
85 Y (Fig. 1 E-F). If interacting chromophores are well separated spectrally, their contribution to the  
86 covariance matrix produces lobes away from the main axis, as is the case for GR and YR interactions (Fig.  
87 1 E, G-H). In the case of ternary interactions, there is both the more prominent, broad peak from the  
88 highly overlapping GY interactions and broader off axis lobes from concomitant GR and YR interactions  
89 (Fig. 1 E).

90

### 91 *Distribution of Fluorescent Oligomer States by Fluorescence Covariance Matrix Analysis*

92 The covariance matrices and corresponding detection spectra from images of cells expressing three  
93 chromophores on CD86 were fit using a seven-component model accounting for the following species:  
94 G, Y, R, GY, GR, YR, and GYR. For each component, an apparent number density is determined and the  
95 fractional distribution of each chromophore across different oligomer states is found (Fig. 2). The sum  
96 of fractional densities for each chromophore is unity. For the triple expression of monomeric proteins,  
97 CD86-G, CD86-Y, and CD86-R the largest fractions for each chromophore are observed in monomeric  
98 states (Fig. 2 A). We did observe some apparent GY and YR interactions which we take as the  
99 background levels for further experiments. GYR fractions were negligible.

100 In cells where the heterotrimer, R-CD86-Y-G was expressed, all three chromophores are found  
101 to be spread across several oligomer states (Fig. 2 B). This phenomenon can be understood by

102 considering the existence of dark state fractions for each chromophore. A single protein will only  
103 contribute to the GYR (trimer) fraction if all of its constituent chromophores are correctly folded into the  
104 fluorescent state. Due to this effect, only small fractions (~20-30% per chromophore) appear in the  
105 trimeric state. Correspondingly, the dimeric states are populated by contributions from proteins with  
106 one chromophore in a dark state and the monomeric states are populated by contributions from  
107 proteins with two chromophores in dark states.

108 Data from cotransfections of dimer and monomer constructs produce similar results. For CD86-  
109 Y-G and CD86-R cotransfections, G is distributed predominantly between G (~65%) and GY (~35%) states  
110 (Fig. 2 C). Similarly, Y is split between Y (~50%) and GY (~50%) states. R is found almost exclusively in its  
111 monomeric state. For CD86-G expressed with R-CD86-Y, YR interaction is detected along with smaller  
112 fractions in Y and R monomeric states (Fig. 2 D). G is found almost exclusively in its monomeric state.  
113 For R-CD86-G expressed with CD86-Y, G and R are split between their respective monomeric states and  
114 GR interacting state, whereas Y almost exclusively found in its monomeric state (Fig. 2 E).

115

#### 116 *Control Analysis by Spectrally Resolved RICS*

117 To compare with an established method, we processed the same datasets used for FCMA with spectrally  
118 resolved raster image correlation spectroscopy (RICS). In contrast with FCMA, the 23 channel spectrally  
119 resolved images must be unmixed prior to analysis into three single-color images, each corresponding to  
120 a single chromophore (Fig. S1 B-D). Fitting model spatial auto- and cross-correlation functions allows for  
121 the calculation of relative cross-correlation amplitudes, a readout of the interaction between pairs of  
122 chromophores. Results from RICS analysis (Fig. 2 F) are in good agreement with those found with FCMA.  
123 The data show very little interaction between chromophores in triple transfections of G, Y, and R  
124 monomers. Images of the R-CD86-Y-G trimer exhibit strong, but not ideal, relative cross-correlations

125 among the three possible pairings. For monomer/dimer coexpressions, CD86-Y-G with CD86-R displays  
126 strong GY interactions, R-CD86-Y with CD86-G displays strong YR interaction, and R-CD86-G with CD86-Y  
127 displays strong GR interactions (Fig. 2 F). Conventional RICS analysis is limited to concomitant  
128 measurements of binary interactions while ternary interactions cannot be detected directly and must be  
129 inferred. In contrast, ternary interactions can be quantified directly from covariance matrices (Fig. 1 E,  
130 Fig. 2 B).

131

### 132 *Measuring Activation Ligand Induced G Protein Dissociation through DRD2 and ADRA2A*

133 To express all three G proteins at physiologically appropriate and experimentally pragmatic levels, we  
134 modified a polycistronic construct introduced by Unen et al (37) to carry mCherry2 tags on GNB1 and  
135 GNG2 and an mEYFP(Q69K) tag on GNAI1 (Fig. S2). With this configuration, we labeled the two  
136 functional G protein components with Y and R. This construct was expressed in tandem with a G labeled  
137 GPCR so that all three components of the GPCR signaling triplet could be monitored simultaneously.  
138 The two Gai-coupled GPCRs studied here were DRD2 (dopamine) and ADRA2A (epinephrine).

139 GNAI1-Y is primarily a fluorescent monomer, as determined by FCMA, with ~50-70% of Y  
140 chromophores appearing monomeric before the addition of a GPCR stimulating ligand (Fig. 3). The weak  
141 interactions detected between GNAI1-Y and GPCRs G-DRD2 (Fig. 3 A-B) and G-ADRA2A (Fig. 3 C-D) are  
142 comparable to background interaction levels found in control experiments featuring CD86 (Fig. 2 A).  
143 There is significant interaction between GNAI1-Y and R-GNB1/R-GNG2 with ~20% of Y chromophores  
144 being found in these interactions. The Y and YR fractions are sensitive to GPCR stimulation by its native  
145 ligand. When expressed with G-DRD2, the fraction of Y participating in YR interactions decreases from  
146 ~20% to ~10% after stimulation with 100  $\mu$ M dopamine (Fig. 3 B). Similarly, when expressed with G-

147 ADRA2A, the YR fraction decreases from ~20% to ~10% after stimulation with 30  $\mu$ M epinephrine (Fig. 3  
148 D).

149 The distributions of G-DRD2 and G-ADRA2A are dominated by noninteracting fractions  
150 consisting of ~90% of independent G chromophores (Fig. S3 A-B, Fig. S4 A-B). Apparent interactions  
151 with Y-GNAI1 and R-GNB1/R-GNG2 are comparable to background levels observed in control  
152 experiments (Fig. 2 A) and trimer (GYR) fractions were negligible.

153 R-GNB1/R-GNG2 also appears almost entirely as noninteracting with the other chromophores  
154 (>90%) (Fig. S3 C-D, Fig. S4 C-D). The apparent asymmetry between the fraction of Y participating in YR  
155 interactions and the fraction of R participating YR interactions comes from the relative expression levels  
156 of these two chromophores. Because GNAI1-Y expression is dictated by an internal ribosome entry site  
157 (Fig. S2), its expression is approximately three times lower than that of R-GNB1 and R-GNG2 (37).

158 We observe small relative changes in oligomer state distributions for G-GPCRs and R-GNB1/R-  
159 GNG2 in response to GPCR stimulation. The GR fraction of R chromophores increases after dopamine  
160 stimulation (Fig. S3 D), the GYR fraction of G chromophores decreases after epinephrine stimulation (Fig.  
161 S4 B), and the GYR fraction of R chromophores also decreases after epinephrine stimulation (Fig. S4 D).  
162 In each of these cases, the absolute oligomer fractions do not differ significantly from background levels  
163 (Fig. 2) and are unlikely to represent biologically relevant findings.

164

### 165 *Spectrally Resolved RICS Analysis of GPCR Stimulation Experiments*

166 Datasets for FCMA of G protein activation were also processed using spectrally resolved RICS. The  
167 results from these analyses are in good agreement with those determined by FCMA. We observe



168 negligible relative cross-correlations for GY and GR pairings (Fig. 4). Like FCMA, we observe YR relative  
169 cross-correlations that are sensitive to GPCR stimulation (Fig. 4 B, D).

170

### 171 *Diffusion Coefficients by Spectrally Resolved RICS*

172 In contrast to FCMA, spectrally resolved RICS analysis also provides the apparent diffusion coefficient of  
173 each chromophore as an additional readout. While there are no statistically significant changes in the  
174 apparent diffusion coefficients for the GPCRs or G proteins in response to GPCR stimulation, there are  
175 distinct diffusivities among the components of the signaling cascade (Fig. 5). GPCRs, DRD2 and ADRA2A,  
176 are the least diffusive, averaging  $\sim 0.25 \mu\text{m}^2/\text{s}$ . The R labelled GNB1/GNG2 component moves slightly  
177 faster than the receptors, averaging  $\sim 0.5 \mu\text{m}^2/\text{s}$ . The Y labelled GNAI1 is the most diffusive,  $\sim 0.7 \mu\text{m}^2/\text{s}$ ,  
178 and shows a trend towards faster diffusion following stimulation of both GPCRs ( $p=0.071$  with G-DRD2  
179 and  $p=0.074$  for G-ADRA2A) (Fig. 5 B, D).

180

## 181 **Discussion**

182 We have demonstrated FCMA as a fluorescence fluctuation analysis tool suitable for multicolor imaging  
183 experiments in live cells. In this analysis, heteromeric combinations leave unique fingerprints on the  
184 covariance matrices calculated from spectrally resolved images (Fig. 1). The relative contributions of  
185 different oligomer states can be determined from fitting model functions and the resulting information  
186 tells us how chromophores are distributed across these states (Fig. 2).

187 FCMA is complementary to recent developments in spectrally resolved image correlation  
188 spectroscopy. FCMA and spectrally resolved RICS achieve many of the same goals. Both quantify the  
189 degree of interaction between two or more chromophores (Figs. 2-4). RICS, and other correlation

190 function-based approaches, have the advantage of providing information about transport properties by  
191 outputting fitted diffusion coefficients (Fig. 5). However, as we show in this work, FCMA detects ternary  
192 interactions directly (Fig. 2 B), which offers a more robust and simpler computational procedure.  
193 Ternary complex detection has been achieved with triple correlation analysis (TRICS), but that relies on  
194 higher order correlation functions which greatly increase the signal-to-noise requirements for the data  
195 and computational complexity (17, 38). Additionally, visual inspection of covariance matrices allows for  
196 the straightforward observation of complex formation that has an intuitive connection to the emission  
197 spectra (Fig. 1, Fig. S1 C). In practice, both analyses can be implemented in parallel with the same  
198 fluorescence imaging data.

199         The FMCA approach allows for simultaneous measurements of the three major components of  
200 the canonical GPCR/G-protein signaling pathway directly with fluorescence in live cells (Fig. 3, Fig. S3-  
201 S4). These data are highly relevant to our mechanistic understanding of the signal propagation through  
202 GPCR/G protein pathways (23). The two predominant models of G protein activation are collisional  
203 coupling (26–28) and pre-assembled complexes (29–31). In collisional coupling models, GPCRs and G  
204 proteins have independent Brownian motions aside from their brief interactions when the GPCR is  
205 activated. Conversely, pre-assembly models posit that stable GPCR/G protein complexes are present  
206 with the components maintaining contact throughout the signaling processes. Biochemically, the  
207 distinction between collisional coupling and pre-assembly models arises from the affinities of GPCR/G  
208 protein interactions (32). In this work, we did not find interactions between GPCRs (DRD2 and ADRA2A)  
209 and G proteins ( $G\alpha 1/G\beta 1/G\gamma 2$ ) (Fig. 3-4, Fig. S3-S4) that were distinguishable from background (Fig. 2).  
210 These data suggest that these GPCR-G protein components interact through weak, transient  
211 associations below what is detectable with our current experimental sensitivity. Additionally, we  
212 observed that the GPCR and G protein components have distinct apparent diffusion coefficients  
213 suggesting that they are not constitutively coupled as a pre-assembly model would suggest (Fig. 5).

214 Although these data are consistent with a collisional coupling mechanism of GPCR signaling, we are  
215 limited by the fidelity of the chromophores to radiative states (Fig. 2 B-E) (39). Recently, spectrally  
216 resolved FFS for four chromophores has been demonstrated in live cell experiments, opening the door  
217 for the expansion of the work shown here to include more components of the signaling cascade such as  
218 downstream effectors (17).

219

## 220 **Methods**

### 221 *DNA Plasmids*

222 Subcloning to generate plasmids used in these studies was performed using standard molecular biology  
223 techniques. Most experiments utilized In-Fusion cloning reagents from Takara Bio Inc or ig-Fusion  
224 cloning reagents from Intact Genomics to facilitate subcloning unless noted otherwise. Reagents were  
225 used following the manufacturers' protocols. Primers to generate linearized vectors and inserts are  
226 listed in Table S1.

227 Monomeric and multimeric fluorescent controls were derived by modifying previously published  
228 plasmids designed to express CD86-EGFP (Addgene # 133858) and mApple-CD86-EGFP (Addgene  
229 #133860) at the plasma membrane of mammalian cells (8). Parent plasmids were linearized using  
230 inverse polymerase chain reactions to allow for insertions of fluorescent protein gene substitutes. Three  
231 fluorescent proteins were used as labels in this work: mEGFP, mEYFP(Q69K), and mCherry2 (39–42),  
232 abbreviated as G, Y, and R, respectively. Monomeric controls, CD86-G, CD86-Y, and CD86-R were  
233 produced by making swaps against EGFP in CD86-EGFP. The dimeric controls R-CD86-G and R-CD86-Y  
234 were produced by making dual swaps against mApple and EGFP in mApple-CD86-EGFP. To generate  
235 CD86-Y-G and R-CD86-Y-G, an additional fluorescent protein site was introduced in the C-terminal linker  
236 regions of CD86-G and R-CD86-G, respectively. mEGFP encoding inserts were amplified from G-DRD2

237 described below. mEYFP(Q69K) was available from previous work in our lab (43). An mCherry2 donor  
238 plasmid (#54563) was obtained from Addgene thanks to a generous donation by Michael Davidson.

239 A polycistronic construct to express G proteins GNAI1, GNB1, and GNG2 with the fluorescent  
240 protein labels used in control experiments was created by modifying a plasmid introduced by van Unen  
241 et al (37). The parent plasmid, GNB1-T2A-cpVenus-GNG2-IRES-GNAI1-mTurquoise2, was obtained from  
242 Addgene (#69623). Both proteins of the G $\beta$ 1 $\gamma$ 2 functional unit were labeled with R. R-GNB1 was  
243 generated by swapping R against EGFP in EGFP-GNB1 described previously (Addgene #133856) using  
244 restriction sites AgeI and BsrGI (8). GNB1-T2A-cpVenus-GNG2-IRES-GNAI1-mTurquoise2 was linearized  
245 about GNB1 by digestion with NheI and SacI, and R-GNB1 was inserted. An N-terminal label of GNG2  
246 was introduced by linearizing the parent plasmid about its cpVenus encoding region and inserting R. Y  
247 was swapped against mTurquoise2 in the parent plasmid in two steps. First Y was swapped against  
248 mTurquoise2 in the monocistronic version of the plasmid, GNAI1-mTurquoise2 (Addgene #69620), using  
249 restriction digestion at AgeI sites to linearize the parent plasmid about mTurquoise2 and create GNAI1-Y  
250 by insertion of Y against mTurquoise2. BssHIII and XmaI restriction sites were used to insert Y flanked by  
251 partial fragments of GNAI1 into the target vector using T4 ligation. A schematic of the final construct, R-  
252 GNB1-T2A-R-GNG2-IRES-GNAI1-Y is shown in Figure S2.

253 G-DRD2 was created from EGFP-DRD2, from previous work (8, 44), by using site directed  
254 mutagenesis to introduce the A206K modification to EGFP (40). To create G-ADRA2A, G-DRD2 was  
255 linearized about its DRD2 encoding region. ADRA2A was amplified from ADRA2A-Tango, obtained from  
256 Addgene (#66216) as a gift from Bryan Roth (45), and inserted against the position previously occupied  
257 by DRD2. All plasmids and their sequences will be made available via Addgene  
258 ([https://www.addgene.org/Dave\\_Piston/](https://www.addgene.org/Dave_Piston/)).

259

260 *Cell Culture and Transfection*

261 HEK293 cells were cultured in 1:1 Dulbecco's Modified Eagle's Medium/F-12 Ham with Glutamax+  
262 supplemented with 10% fetal bovine serum albumin, penicillin, and streptomycin. Cells were incubated  
263 at 37 C with 5% CO<sub>2</sub>. Cells with passage number between 25 and 35 were used. For imaging, cells were  
264 transfected by electroporation. For a typical experiment, 1.5 x 10<sup>6</sup> cells were electroporated with 1-3 ug  
265 of plasmid DNA per construct in a 2 mm gap cuvette and seeded among three four-chamber dishes with  
266 30 mm diameters so that cells were at 50-75% confluency at the time of imaging. Electroporation was  
267 performed with eight 150 V pulses lasting 100 μs separated by 500 ms intervals. Cells were imaged 12-  
268 36 hours after electroporation.

269

270 *Confocal microscopy*

271 All imaging experiments were conducting with a Zeiss LSM 880 confocal laser scanning microscope using  
272 a 40x, 1.2 NA, C-Apochromat water immersion objective lens. 488 nm was used to excite G and Y, and  
273 561 nm was used to excite R. Typical laser intensities measured after the objective lens were 450 nW  
274 for 488 nm and 1.3 μW for 561 nm. A 488/561 main beam splitter was used to separate excitation and  
275 emission. For imaging of the basal plasma membrane for FCMA and spectrally resolved RICS analysis,  
276 scanning was performed over 256x256 pixels spanning a 13.28x13.28 μm<sup>2</sup> area, 50 nm/pixel, 16.48  
277 us/pixel, and 45 frames per cell. The 32-bin Quasar spectral detector recorded photoelectron counts by  
278 either photon counting or lambda mode in spectral bins of 8.9 nm spanning 490-695 nm (Figure S2).

279 Before imaging, cells were washed twice, and the growth buffer was replaced with Hanks'  
280 Balanced Salt Solution (HBSS). During imaging cells were kept at 37 C with 5% CO<sub>2</sub> using an incubated  
281 stage. For GPCR stimulation experiments, the same cells were imaged before and after the addition of  
282 the stimulus with approximately one minute of incubation between acquisitions.

283

## 284 *Fluorescence Covariance Matrix Analysis*

285 FCMA is an extension of multicolor fluorescence cumulant analysis applied to spectrally resolved  
286 imaging data (8, 34, 35). For spectrally resolved imaging data the first order cumulants,  $\kappa_{[1]}(i)$ , are  
287 equal to the average detection spectrum of the pixels within the region of interest, R. The second order  
288 cumulants,  $\kappa_{[1,1]}(i, j)$ , are equal to the covariance matrix for all pairs of channels,  $(i, j)$ .

$$289 \quad \hat{\kappa}_{[1]}(i) = \langle F_i(x, y) \rangle_{(x,y) \in R} \quad (1)$$

$$290 \quad \hat{\kappa}_{[1,1]}(i, j) = \langle F_i(x, y) F_j(x + 1, y) \rangle_{(x,y) \in R} \quad (2)$$

291  $F_i(x, y)$  denotes the fluorescence signal in photoelectrons at pixel  $(x, y)$  in channel  $i$ . To select regions  
292 of interest from images of basal plasma membranes we used a combination of polygonal selection and  
293 intensity thresholds of blurred images described previously (8, 46). Region of interest selection was  
294 performed on the spectrally unmixed images (Fig. S2 B-D) found for spectrally resolved RICS described  
295 below. To avoid complications from crosstalk in spectral detection we used a single pixel offset in the  
296 scanning axis (i.e.  $(x + 1)$ ) discussed in depth in previous work (8).

297 Apparent number densities ( $N_S$ ) and molecular brightnesses ( $\varepsilon_S$ ) of species within the detection  
298 volume of the confocal microscope are related to the first and second order cumulants by:

$$299 \quad \kappa_{[1]}(i) = \sum_S^{Species} N_S \cdot \varepsilon_S \cdot P_S^{\{1\}}(i) \quad (3)$$

$$300 \quad \kappa_{[1,1]}(i, j) = \gamma_2 \sum_S^{Species} N_S \cdot \varepsilon_S^2 \cdot P_S^{\{2\}}(i, j) \quad (4)$$

301  $\gamma_2$  is a shape factor depending on the geometry of the detection volume. For this work we used  $\gamma_2 =$   
 302 0.5 corresponding to a two-dimensional Gaussian detection volume (47).  $P_S^{\{1\}}(i)$  for a species  
 303 consisting of a single chromophore is equal to that chromophore's detection spectrum normalized such  
 304 that its sum is unity.  $P_S^{\{2\}}(i, j)$  is found from the outer product of  $P_S^{\{1\}}(i)$  with itself,  $P_S^{\{2\}}(i, j) =$   
 305  $P_S^{\{1\}}(i) \cdot P_S^{\{1\}}(j)$ . When multiple chromophores are present in a species,  $P_S^{\{1\}}(i)$  is an average of its  
 306 component parts weighted by the brightnesses of its constitutive chromophores ( $C$ ):

$$307 \quad P_S^{\{1\}}(i) = \frac{1}{\sum_C \varepsilon_C} \sum_C \varepsilon_C P_C^{\{1\}}(i) \quad (5)$$

308  $P_C^{\{1\}}(i)$  are determined in control experiments where a single chromophore is expressed. A  
 309 consequence of Eqn. 5 is that species composed of unique combinations of chromophores are linearly  
 310 independent.

311 For the three chromophore experiments performed in this work, we fit a seven species model to  
 312 the detection spectra and covariance matrices. The number density was allowed to vary for each  
 313 species and the molecular brightness was linked across species so that 10 variables were determined  
 314 when fitting  $\hat{\kappa}_{[1]}(i)$  and  $\hat{\kappa}_{[1,1]}(i, j)$ :  $N_G, N_Y, N_R, N_{GY}, N_{GR}, N_{YR}, N_{GYR}, \varepsilon_G, \varepsilon_Y,$  and  $\varepsilon_R$ . Fitting was  
 315 performed using Levenberg-Marquardt least squares minimization comparing experimentally  
 316 determined  $\hat{\kappa}_{[1]}$  and  $\hat{\kappa}_{[1,1]}$  to theoretical values  $\kappa_{[1]}$  and  $\kappa_{[1,1]}$  (48, 49).

317 In this work, we focus on the distribution of number densities. Data are presented as fractional  
 318 number densities. For example, for G containing species the fractional number density for species  $x$  is:

$$319 \quad f_x = \frac{N_x}{N_G + N_{GY} + N_{GR} + N_{GYR}} \quad (6)$$

320

321 , where  $x$  is  $G, GY, GR,$  or  $GYR$ .

322

323 *Spectrally Resolved Raster Image Correlation Spectroscopy*

324 Spectrally resolved RICS was implemented following the approach established by Schrimpf et al (16)

325 with some modifications introduced by Dunsing et al (17). For RICS analysis, the 23 channel raw images

326 must first be decomposed into three-color images with each color corresponding to the fraction of that

327 chromophore (Fig. S1). Regions of interest were specified using a combination of manual polygonal

328 selection and intensity thresholding of blurred images (8). A temporal high pass filter was employed to

329 exclude large fluctuations due to cellular movement and heterogeneity. The width of the high pass filter

330 was three frames.

331 Spatial auto- and cross-correlation functions for each color and color pairing were calculated

332 from binary masks using the arbitrary region algorithm described by Hendrix et al (46). Correlation

333 functions were fit with a model function for two-dimensional diffusion:

334 
$$G(\xi, \psi) = G_0 \left( 1 + \frac{4D}{\omega_0^2} |\tau_{px}(\xi - \xi_0) + \tau_{ln}\psi| \right)^{-1} \exp \left( -\delta r^2 \frac{((\xi - \xi_0)^2 + \psi^2)}{\omega_0^2 + 4D |\tau_{px}(\xi - \xi_0) + \tau_{ln}\psi|} \right) \quad (7)$$

335  $\xi$  and  $\psi$  are the lags along the scanning and scanning-orthogonal axes, respectively.  $G_0$  is the

336 amplitude.  $D$  is the apparent diffusion coefficient.  $\omega_0$  is the  $e^{-2}$  radius of the two-dimensional

337 Gaussian detection area.  $\tau_{px}$  and  $\tau_{ln}$  are the pixel and line times, respectively.  $\delta r$  is the pixel size.  $\xi_0$  is

338 the pixel lag along the scanning axis that produces the greatest fitted amplitude,  $G_0$ .

339 We used the technique employed by Dunsing et al (17) to identify cross-correlation functions

340 that did not have significant amplitudes. During fitting the initial  $\xi_0$  value was set to eight and if the

341 fitted  $\xi_0$  was greater than three this was treated as having a nonsignificant correlation amplitude so that

342  $G_0 = 0$  for that experiment. This approach has the effect of ignoring spurious peaks at large pixel lags

343 where the SNR is poor. To fit autocorrelation functions  $\xi_0$  was set to zero.



344 For the three chromophore experiments described in this work, spectrally resolved RICS  
345 generates six correlation functions, three autocorrelation functions (GG, YY, RR) and three cross-  
346 correlation functions (GY, GR, YR). Relative cross-correlations are calculated to quantify heteromeric  
347 interactions:

$$348 \quad Rel. CC = \max \left\{ \frac{G_0^{ij}}{G_0^{ii}}, \frac{G_0^{ij}}{G_0^{jj}} \right\} \quad (8)$$

349 *i* and *j* specify the chromophore/channel.

350 As quality control measures, only data with SNRs greater than three in all autocorrelation  
351 functions and G/Y mean fluorescence ratios bounded by [1/10, 10] were included. SNRs were calculated  
352 using the method described by Schimpf et al (16).

353

### 354 *Plotting and Statistics*

355 Data are presented as swarm plots overlaid on box plots. The boxes indicate interquartile  
356 ranges. The centerlines indicate medians. Red exes indicate means. Whiskers are 1.5 times the  
357 interquartile ranges. Unless indicated otherwise, statistical tests were two-sided paired t-tests  
358 implemented with SciPy (50).

359

### 360 *Data and Code Availability*

361 Analyses were performed using a series of IPython notebooks that are available at  
362 <https://github.com/d-foust/fcma>. Source data are available upon request.

363

### 364 **Competing Interests**

365 The authors have no competing interests to declare.

366

### 367 **Author contributions**

368 DJF and DWP planned the research. DJF performed the experiments, completed the analysis, and wrote  
369 the manuscript draft, which was edited by both authors.

370

### 371 **Acknowledgements**

372 DJF received support from National Institutes of Health training grants T32EB14855 and T32DK108742.

373 This research was supported by NIH grants R01DK123301 and R01DK115972 to DWP and by the

374 Washington University Center for Cellular Imaging supported in part by the Diabetes Research Center

375 (P30DK020579).

376

### 377 **References**

378 1. Elson, E.L. 2011. Fluorescence Correlation Spectroscopy: Past, Present, Future. *Biophys. J.* 101:2855–  
379 2870.

380 2. Qian, H., and E.L. Elson. 1990. Distribution of molecular aggregation by analysis of fluctuation  
381 moments. *Proc. Natl. Acad. Sci.* 87:5479–5483.

382 3. Chen, Y., J.D. Müller, P.T.C. So, and E. Gratton. 1999. The Photon Counting Histogram in  
383 Fluorescence Fluctuation Spectroscopy. *Biophys. J.* 77:553–567.

384 4. Magde, D., E. Elson, and W.W. Webb. 1972. Thermodynamic Fluctuations in a Reacting System---  
385 Measurement by Fluorescence Correlation Spectroscopy. *Phys. Rev. Lett.* 29:705–708.

386 5. Godin, A.G., S. Costantino, L.-E. Lorenzo, J.L. Swift, M. Sergeev, A. Ribeiro-da-Silva, Y.D. Koninck, and  
387 P.W. Wiseman. 2011. Revealing protein oligomerization and densities in situ using spatial intensity  
388 distribution analysis. *Proc. Natl. Acad. Sci.* 108:7010–7015.

- 389 6. Sergeev, M., S. Costantino, and P.W. Wiseman. 2006. Measurement of Monomer-Oligomer  
390 Distributions via Fluorescence Moment Image Analysis. *Biophys. J.* 91:3884–3896.
- 391 7. Digman, M.A., R. Dalal, A.F. Horwitz, and E. Gratton. 2008. Mapping the Number of Molecules and  
392 Brightness in the Laser Scanning Microscope. *Biophys. J.* 94:2320–2332.
- 393 8. Foust, D.J., A.G. Godin, A. Ustione, P.W. Wiseman, and D.W. Piston. 2019. Two-Color Spatial  
394 Cumulant Analysis Detects Heteromeric Interactions between Membrane Proteins. *Biophys. J.*  
395 117:1764–1777.
- 396 9. Chen, Y., M. Tekmen, L. Hillesheim, J. Skinner, B. Wu, and J.D. Müller. 2005. Dual-Color Photon-  
397 Counting Histogram. *Biophys. J.* 88:2177–2192.
- 398 10. Schwille, P., F.J. Meyer-Almes, and R. Rigler. 1997. Dual-color fluorescence cross-correlation  
399 spectroscopy for multicomponent diffusional analysis in solution. *Biophys. J.* 72:1878–1886.
- 400 11. Hwang, L.C., M. Leutenegger, M. Gösch, T. Lasser, P. Rigler, W. Meier, and T. Wohland. 2006. Prism-  
401 based multicolor fluorescence correlation spectrometer. *Opt. Lett.* 31:1310–1312.
- 402 12. Burkhardt, M., K.G. Heinze, and P. Schwille. 2005. Four-color fluorescence correlation spectroscopy  
403 realized in a grating-based detection platform. *Opt. Lett.* 30:2266–2268.
- 404 13. Previte, M.J.R., S. Pelet, K.H. Kim, C. Buehler, and P.T.C. So. 2008. Spectrally Resolved Fluorescence  
405 Correlation Spectroscopy Based on Global Analysis. *Anal. Chem.* 80:3277–3284.
- 406 14. Benda, A., P. Kapusta, M. Hof, and K. Gaus. 2014. Fluorescence spectral correlation spectroscopy  
407 (FSCS) for probes with highly overlapping emission spectra. *Opt. Express.* 22:2973–2988.
- 408 15. Felekyan, S., S. Kalinin, H. Sanabria, A. Valeri, and C.A.M. Seidel. 2012. Filtered FCS: Species Auto-  
409 and Cross-Correlation Functions Highlight Binding and Dynamics in Biomolecules. *ChemPhysChem.*  
410 13:1036–1053.
- 411 16. Schrimpf, W., V. Lemmens, N. Smisdom, M. Ameloot, D.C. Lamb, and J. Hendrix. 2018. Crosstalk-free  
412 multicolor RICS using spectral weighting. *Methods.* 140–141:97–111.
- 413 17. Dunsing, V., A. Petrich, and S. Chiantia. 2021. Multi-color fluorescence fluctuation spectroscopy in  
414 living cells via spectral detection. *eLife.* 10:e69687.
- 415 18. Lefkowitz, R.J. 2004. Historical review: a brief history and personal retrospective of seven-  
416 transmembrane receptors. *Trends Pharmacol. Sci.* 25:413–422.
- 417 19. Sutherland, E.W., and T.W. Rall. 1958. Fractionation and characterization of a cyclic adenine  
418 ribonucleotide formed by tissue particles. *J. Biol. Chem.* 232:1077–1091.
- 419 20. Gilman, A.G. 1987. G proteins: transducers of receptor-generated signals. *Annu. Rev. Biochem.*  
420 56:615–649.
- 421 21. Rodbell, M. 1980. The role of hormone receptors and GTP-regulatory proteins in membrane  
422 transduction. *Nature.* 284:17–22.

- 423 22. Bokoch, G.M., T. Katada, J.K. Northup, M. Ui, and A.G. Gilman. 1984. Purification and properties of  
424 the inhibitory guanine nucleotide-binding regulatory component of adenylate cyclase. *J. Biol. Chem.*  
425 259:3560–3567.
- 426 23. Calebiro, D., Z. Koszegi, Y. Lanoiselée, T. Miljus, and S. O’Brien. 2021. G protein-coupled receptor-G  
427 protein interactions: a single-molecule perspective. *Physiol. Rev.* 101:857–906.
- 428 24. Bondar, A., and J. Lazar. 2017. The G protein Gi1 exhibits basal coupling but not preassembly with G  
429 protein-coupled receptors. *J. Biol. Chem.* 292:9690–9698.
- 430 25. Oldham, W.M., and H.E. Hamm. 2008. Heterotrimeric G protein activation by G-protein-coupled  
431 receptors. *Nat. Rev. Mol. Cell Biol.* 9:60–71.
- 432 26. 2005. Dynamics of receptor/G protein coupling in living cells. *EMBO J.* 24:4106–4114.
- 433 27. Orly, J., and M. Schramm. 1976. Coupling of catecholamine receptor from one cell with adenylate  
434 cyclase from another cell by cell fusion. *Proc. Natl. Acad. Sci.* 73:4410–4414.
- 435 28. Tolkovsky, A.M., and A. Levitzki. 1978. Mode of coupling between the  $\beta$ -adrenergic receptor and  
436 adenylate cyclase in turkey erythrocytes. *Biochemistry.* 17:3795–3810.
- 437 29. De Lean, A., J.M. Stadel, and R.J. Lefkowitz. 1980. A ternary complex model explains the agonist-  
438 specific binding properties of the adenylate cyclase-coupled beta-adrenergic receptor. *J. Biol. Chem.*  
439 255:7108–7117.
- 440 30. Tolkovsky, A.M., and A. Levitzki. 1978. Coupling of a single adenylate cyclase of two receptors:  
441 adenosine and catecholamine. *Biochemistry.* 17:3811–3817.
- 442 31. Lohse, M.J., K.N. Klotz, and U. Schwabe. 1991. Mechanism of A2 adenosine receptor activation. I.  
443 Blockade of A2 adenosine receptors by photoaffinity labeling. *Mol. Pharmacol.* 39:517–523.
- 444 32. Weiss, J.M., P.H. Morgan, M.W. Lutz, and T.P. Kenakin. 1996. The Cubic Ternary Complex Receptor-  
445 Occupancy Model I. Model Description. *J. Theor. Biol.* 178:151–167.
- 446 33. Müller, J.D. 2004. Cumulant Analysis in Fluorescence Fluctuation Spectroscopy. *Biophys. J.* 86:3981-  
447 3992.
- 448 34. Wu, B., Y. Chen, and J.D. Müller. 2006. Dual-Color Time-Integrated Fluorescence Cumulant Analysis.  
449 *Biophys. J.* 91:2687–2698.
- 450 35. Hur, K.-H., Y. Chen, and J.D. Mueller. 2016. Characterization of Ternary Protein Systems In Vivo with  
451 Tricolor Heterospecies Partition Analysis. *Biophys. J.* 110:1158–1167.
- 452 36. Wettschureck, N., and S. Offermanns. 2005. Mammalian G proteins and their cell type specific  
453 functions. *Physiol. Rev.* 85:1159–1204.
- 454 37. Unen, J. van, A.D. Stumpf, B. Schmid, N.R. Reinhard, P.L. Hordijk, C. Hoffmann, T.W.J.G. Jr, and J.  
455 Goedhart. 2016. A New Generation of FRET Sensors for Robust Measurement of Gai1, Gai2 and  
456 Gai3 Activation Kinetics in Single Cells. *PLOS ONE.* 11:e0146789.

- 457 38. Melnykov, A.V., and K.B. Hall. 2009. Revival of high-order fluorescence correlation analysis:  
458 generalized theory and biochemical applications. *J. Phys. Chem. B.* 113:15629–15638.
- 459 39. Dunsing, V., M. Luckner, B. Zühlke, R.A. Petazzi, A. Herrmann, and S. Chiantia. 2018. Optimal  
460 fluorescent protein tags for quantifying protein oligomerization in living cells. *Sci. Rep.* 8:10634.
- 461 40. Zacharias, D.A., J.D. Violin, A.C. Newton, and R.Y. Tsien. 2002. Partitioning of lipid-modified  
462 monomeric GFPs into membrane microdomains of live cells. *Science.* 296:913–916.
- 463 41. Griesbeck, O., G.S. Baird, R.E. Campbell, D.A. Zacharias, and R.Y. Tsien. 2001. Reducing the  
464 Environmental Sensitivity of Yellow Fluorescent Protein: MECHANISM AND APPLICATIONS \*. *J. Biol.*  
465 *Chem.* 276:29188–29194.
- 466 42. Landgraf, D., B. Okumus, P. Chien, T.A. Baker, and J. Paulsson. 2012. Segregation of molecules at cell  
467 division reveals native protein localization. *Nat. Methods.* 9:480–482.
- 468 43. Rizzo, M.A., G. Springer, K. Segawa, W.R. Zipfel, and D.W. Piston. 2006. Optimization of Pairings and  
469 Detection Conditions for Measurement of FRET between Cyan and Yellow Fluorescent Proteins.  
470 *Microsc. Microanal.* 12:238–254.
- 471 44. Jeanneteau, F., J. Diaz, P. Sokoloff, and N. Griffon. 2003. Interactions of GIPC with Dopamine D2, D3  
472 but not D4 Receptors Define a Novel Mode of Regulation of G Protein-coupled Receptors. *Mol. Biol.*  
473 *Cell.* 15:696–705.
- 474 45. Kroeze, W.K., M.F. Sassano, X.-P. Huang, K. Lansu, J.D. McCorvy, P.M. Giguere, N. Sciaky, and B.L.  
475 Roth. 2015. PRESTO-TANGO: an open-source resource for interrogation of the druggable human  
476 GPCR-ome. *Nat. Struct. Mol. Biol.* 22:362–369.
- 477 46. Hendrix, J., T. Dekens, W. Schimpf, and D.C. Lamb. 2016. Arbitrary-Region Raster Image Correlation  
478 Spectroscopy. *Biophys. J.* 111:1785–1796.
- 479 47. Müller, J.D., Y. Chen, and E. Gratton. 2003. Fluorescence correlation spectroscopy. *Methods*  
480 *Enzymol.* 361:69–92.
- 481 48. Levenberg, K. 1944. A method for the solution of certain non-linear problems in least squares. *Q.*  
482 *Appl. Math.* 2:164–168.
- 483 49. Marquardt, D.W. 1963. An algorithm for least-squares estimation of nonlinear parameters. *J. Soc.*  
484 *Ind. Appl. Math.* 11:431–441.
- 485 50. Virtanen, P., R. Gommers, T.E. Oliphant, M. Haberland, T. Reddy, D. Cournapeau, E. Burovski, P.  
486 Peterson, W. Weckesser, J. Bright, S.J. van der Walt, M. Brett, J. Wilson, K.J. Millman, N. Mayorov,  
487 A.R.J. Nelson, E. Jones, R. Kern, E. Larson, C.J. Carey, Í. Polat, Y. Feng, E.W. Moore, J. VanderPlas, D.  
488 Laxalde, J. Perktold, R. Cimrman, I. Henriksen, E.A. Quintero, C.R. Harris, A.M. Archibald, A.H.  
489 Ribeiro, F. Pedregosa, and P. van Mulbregt. 2020. SciPy 1.0: fundamental algorithms for scientific  
490 computing in Python. *Nat. Methods.* 17:261–272.

491



### A: G monomer

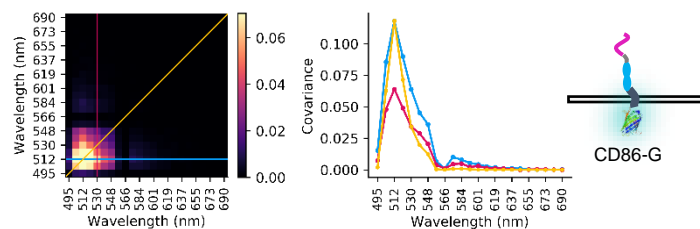

### B: Y monomer

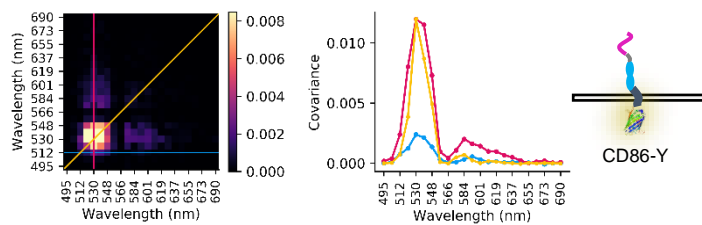

### C: R monomer

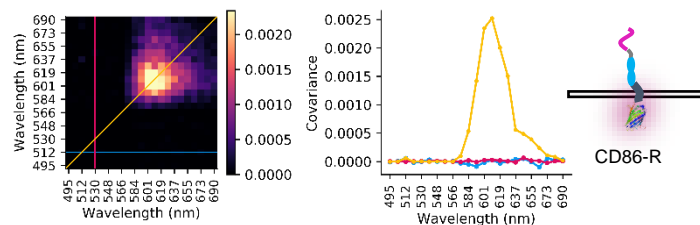

### D: G monomer + Y monomer + R monomer

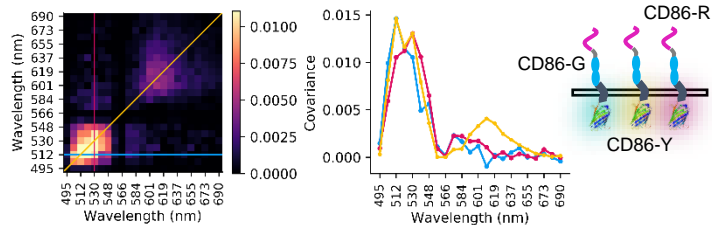

### E: GYR trimer

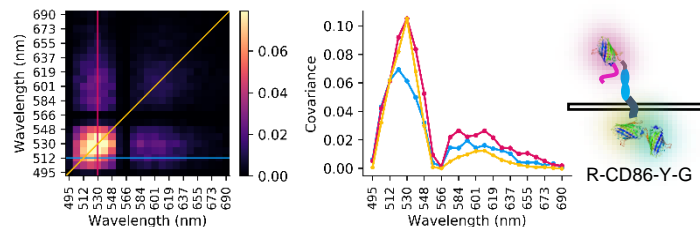

### F: GY dimer + R monomer

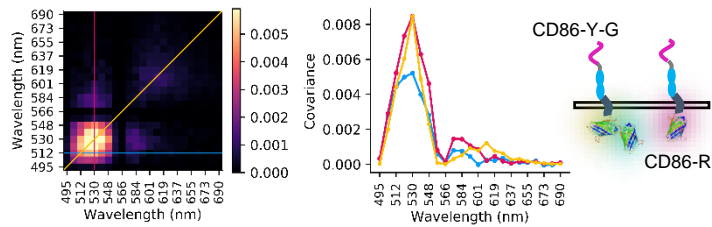

### G: G monomer + YR dimer

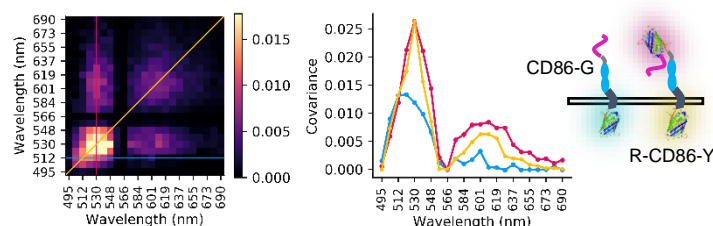

### H: GR dimer + Y monomer

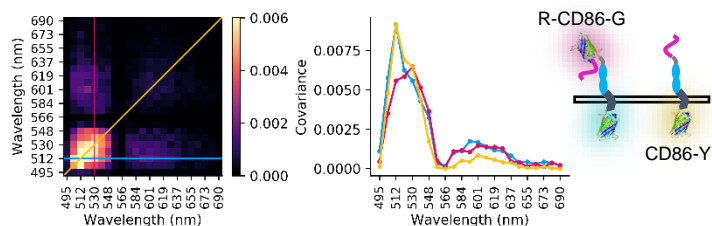

FIGURE 1. Representative covariance matrices ( $\hat{\kappa}_{[1,1]}$ ) for cells expressing fluorescent monomers and heteromers in several permutations. A) CD86-G expressed alone. B) CD86-Y. C) CD86-R. D) Triple transfection of CD86-G, CD86-Y, and CD86-R. E) Fluorescent trimer, R-CD86-Y-G. F) Cotransfection of fluorescent heterodimer CD86-Y-G and fluorescent monomer CD86-R. G) Cotransfection of CD86-G and R-CD86-Y. H) Cotransfection of R-CD86-G and CD86-Y. Covariance matrices are on the left of each panel. Middle plots display profiles indicated by lines on covariance matrices. The yellow lines denote the main diagonal. Blue lines denote the line where ordinate is fixed at 512 nm (peak mEGFP detection). The magenta lines denote where the abscissa is fixed at 530 nm (peak mEYFP(Q69K) detection). On the right are cartoon representations of the molecular constructs expressed in each sample.

### A. CD86-G CD86-Y CD86-R

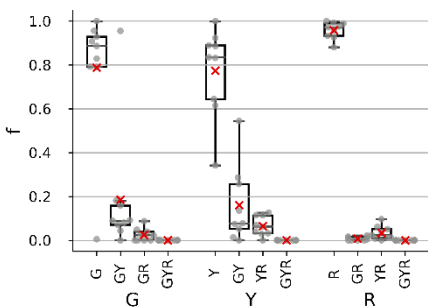

### B. R-CD86-Y-G

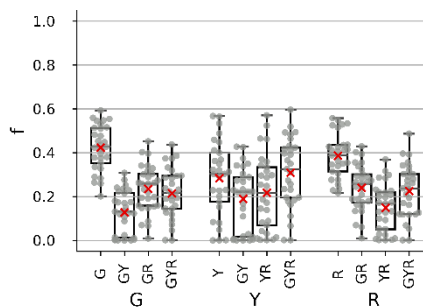

### C. CD86-Y-G CD86-R

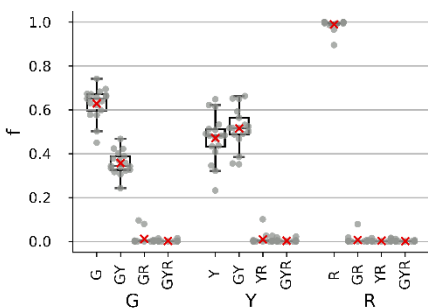

### D. CD86-G R-CD86-Y

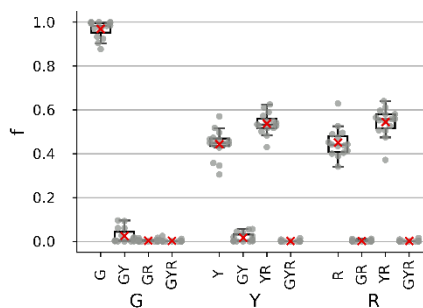

### E. R-CD86-G CD86-Y

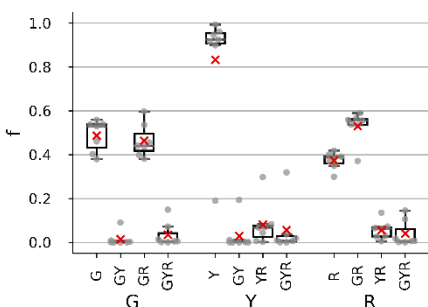

### F. Spectrally Resolved RICS

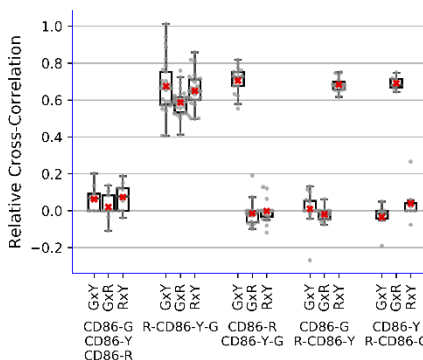

FIGURE 2. Fractional distribution of chromophores among oligomer states determined by fluorescent covariance matrix analysis. Data is from images of HEK 293 cells expressing fluorescent monomers and heteromers. (A) Cotransfection of CD86-G, CD86-Y, and CD86-R. (B) R-CD86-Y-G expressed alone. (C) Cotransfection of CD86-Y-G and CD86-R. (D) Cotransfection of CD86-G and R-CD86-Y. (E) Cotransfection of R-CD86-G and CD86-Y. (F) Relative cross-correlations determined by spectrally resolved RICS for all permutations.



**A. GPCR: G-DRD2**

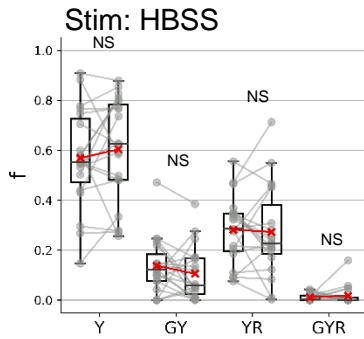

**B. GPCR: G-DRD2**

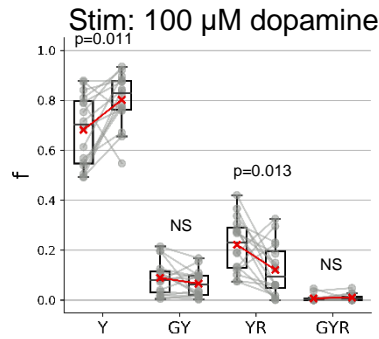

**C. GPCR: G-ADRA2A**

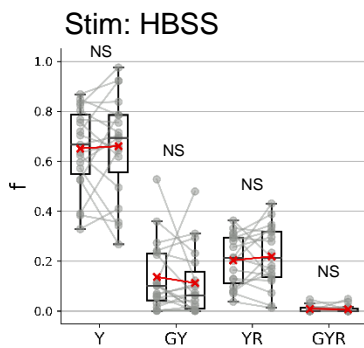

**D. GPCR: G-ADRA2A**

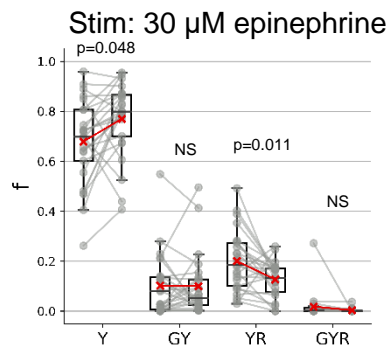

FIGURE 3. Fractional distribution of GNAI1-Y among oligomer states when coexpressed with R-GNB1, R-GNG2, and G-DRD2 or G-ADRA2A determined by covariance matrix analysis. For each state, the left column contains the pre-stimulus fraction, and the right column contains the post-stimulus fraction. A) G-DRD2 is the coexpressed GPCR with the G protein trimer components. Cells were stimulated with additional imaging buffer, HBSS (negative control). B) GPCR G-DRD2 stimulated with 100  $\mu$ M dopamine. C) GPCR G-ADRA2A stimulated with HBSS (negative control). D) G-ADRA2A stimulated with 30  $\mu$ M epinephrine. P-values are the results of two-sided paired t-tests.

### A. GPCR: G-DRD2

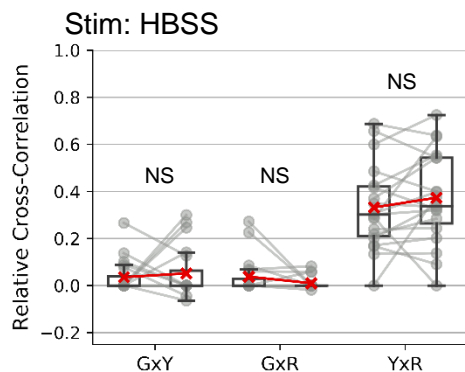

### B. GPCR: G-DRD2

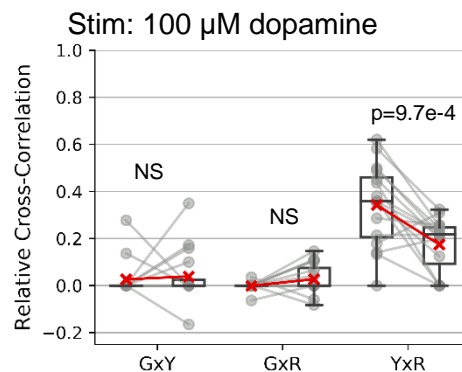

### C. GPCR: G-ADRA2A

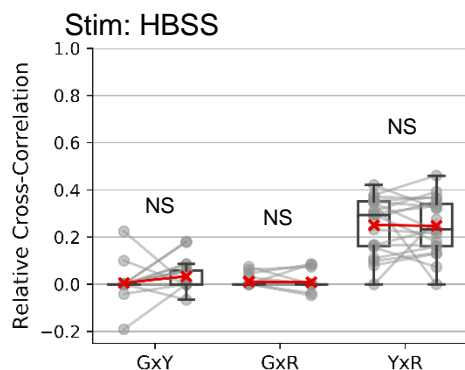

### D. GPCR: G-ADRA2A

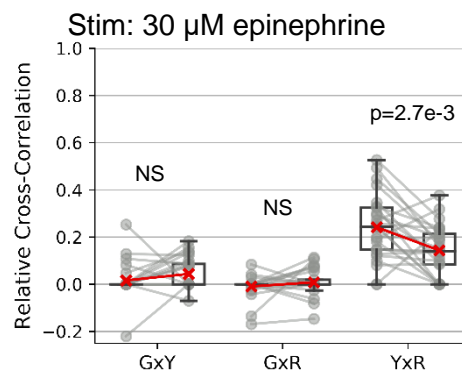

FIGURE 4. Relative cross-correlations determined by spectrally resolved RICS for three components of the G protein signaling cascade. For each chromophore pairing (i.e. GxY), the left column contains the pre-stimulus relative cross-correlations and the right column contains the post-stimulus cross-correlations. A) Relative cross-correlations for labeled GPCR G-DRD2 coexpressed with GNAI1-Y and R-GNB1/R-GNG2 stimulated with HBSS (negative control). B) Relative cross-correlations for G-DRD2, Y-GNAI1, and R-GNB1/R-GNG2 stimulated with 100  $\mu$ M dopamine. C) Relative cross-correlations for G-ADRA2A, Y-GNAI1, and R-GNB1/R-GNG2 stimulated with HBSS (negative control). D) Relative cross-correlations for G-ADRA2A, Y-GNAI1, and R-GNB1/R-GNG2 stimulated with 30  $\mu$ M epinephrine. P-values were determined by two-sided paired t-tests. NS denotes  $p > 0.05$ .

### A. GPCR: G-DRD2

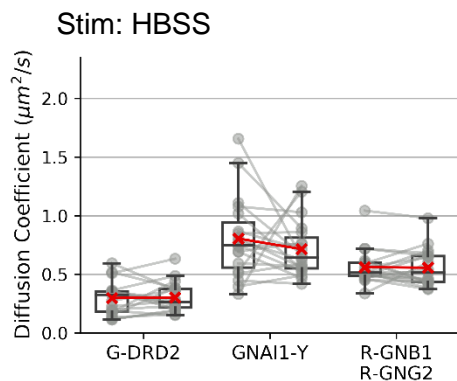

### B. GPCR: G-DRD2

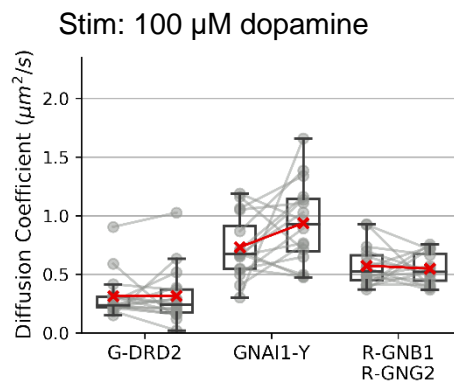

### C. GPCR: G-ADRA2A

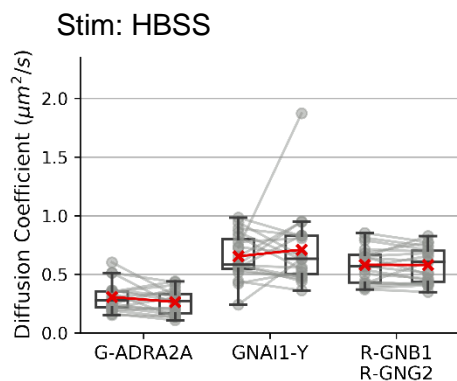

### D. GPCR: G-ADRA2A

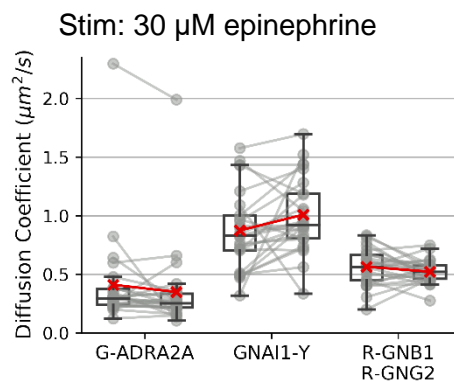

FIGURE 5. Diffusion coefficients for three components of GPCR signaling cascade determined from autocorrelation functions of spectrally resolved RICS. For each component, the left column contains the pre-stimulus diffusion coefficient, and the right column contains the post-stimulus diffusion coefficient. A) G-DRD2, GNAI1-Y, and R-GNB1/R-GNG2 stimulated with HBSS (negative control). B) G-DRD2, GNAI1-Y, and R-GNB1/R-GNG2 stimulated with 100  $\mu\text{M}$  dopamine. C) G-ADRA2A, GNAI1-Y, and R-GNB1/R-GNG2 stimulated with HBSS (negative control). D) G-ADRA2A, GNAI1-Y, and R-GNB1/R-GNG2 stimulated with 30  $\mu\text{M}$  epinephrine. No changes between pre- and post-stimulation diffusion coefficients were found to be statistically significant ( $p > 0.05$ , determined by two-sided paired t-test).

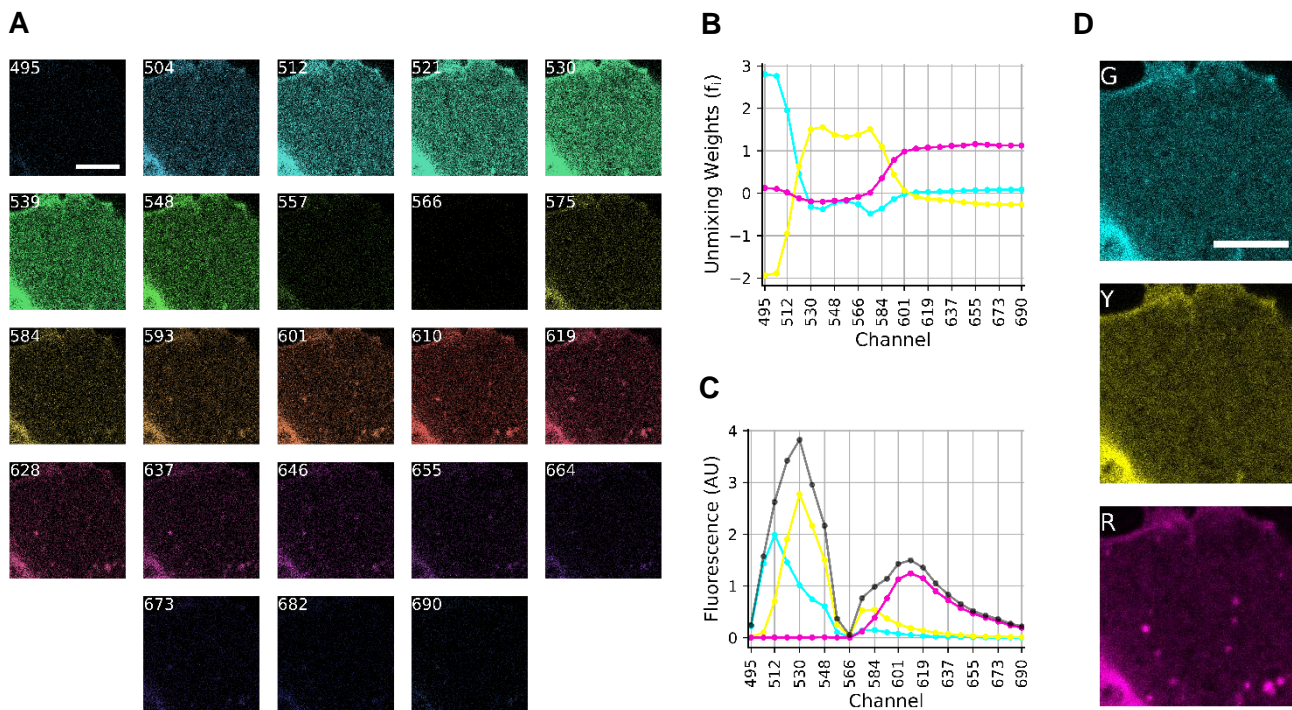

FIGURE S1. Spectral detection and unmixing for covariance matrix analysis and spectrally resolved RICS analysis. A) 23 channel image of the basal plasma membrane of a HEK 293 cell expressing R-CD86-Y-G. Labels denote the midpoint wavelength for each channel. B) Weights for spectral unmixing. Cyan, yellow, and magenta lines indicate weights for mEGFP, mEYFP(Q69K), and mCherry2, respectively. C) Detection spectra for image in panel A. The grey line is the composite detection spectrum. Cyan, yellow, and magenta lines represent contributions from mEGFP, mEYFP(Q69K) and mCherry2, respectively. D) Spectrally unmixed image corresponding to mEGFP, mEYFP(Q69K), and mCherry2. All scale bars are 5  $\mu\text{m}$ .

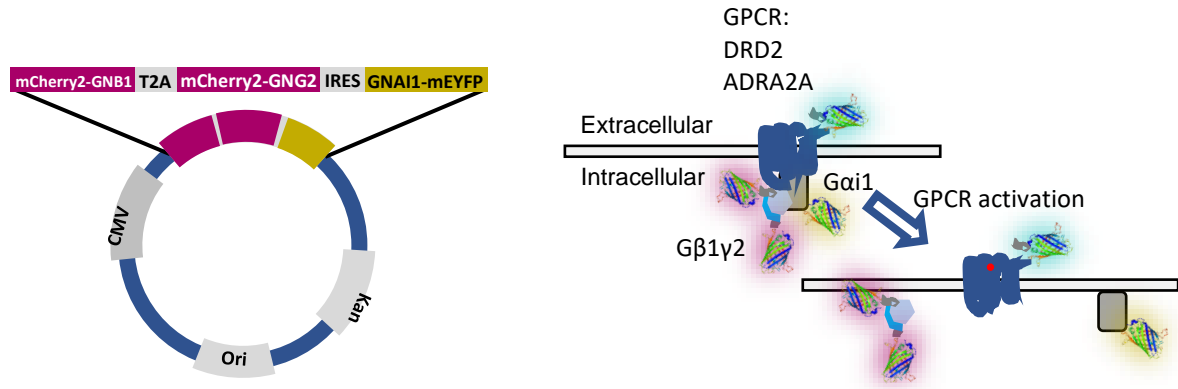

FIGURE S2. Left: Schematic of DNA plasmid used to express three components of the G protein heterotrimer. GNB1 and GNG2 are encoded with mCherry2 tags on their N-termini and separated by a T2A self-cleaving peptide. GNAI1 expression occurs under the control of an internal ribosome entry site and carries an mEYFP(Q69K) tag in the  $\alpha\beta$ - $\alpha\gamma$  loop of GNAI1. Right: Schematic of canonical G protein activation with pre-coupling. A ligand activated GPCR, labeled with mEGFP in this work, catalyzes the dissociation of the G protein complex into G $\alpha$ i1 and G $\beta$ 1 $\gamma$ 2 components.

### A. GPCR: G-DRD2

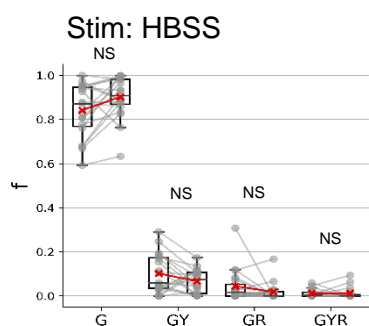

### B. GPCR: G-DRD2

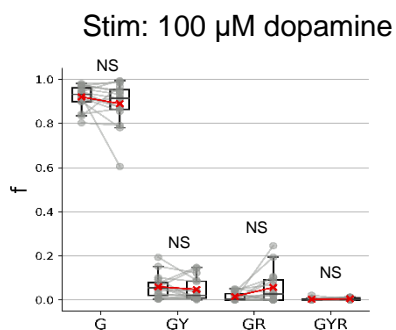

### C. GPCR: G-DRD2

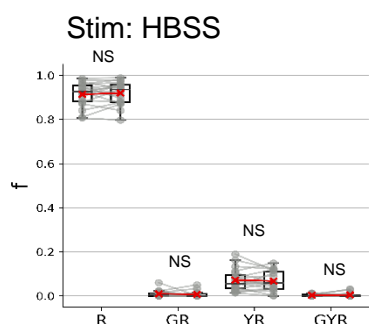

### D. GPCR: G-DRD2

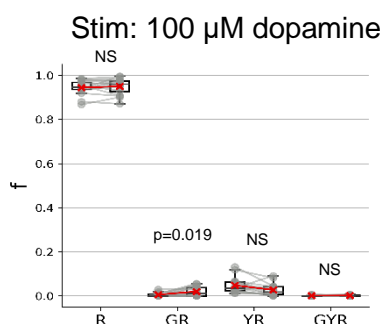

FIGURE S3. Fractional distributions of G-DRD2 and R-GNB1/R-GNG2 among oligomer states determined by covariance matrix analysis (corresponds with data in Figure 3 A-B). For each state, the left column contains the pre-stimulus fraction, and the right column contains the post-stimulus fraction. A) Fractional oligomer distribution of G-DRD2 stimulated with HBSS (negative control). B) Distribution of G-DRD2 stimulated with 100  $\mu$ M dopamine. C) Distribution of R-GNB1/R-GNG2 stimulated with HBSS (negative control). D) Distribution of R-GNB1/R-GNG2 stimulated with 100  $\mu$ M dopamine. P-values are the results of two-sided paired t-tests. NS denotes  $p > 0.05$ .

**A. GPCR: G-ADRA2A**

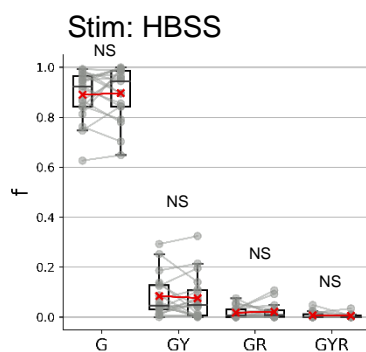

**B. GPCR: G-ADRA2A**

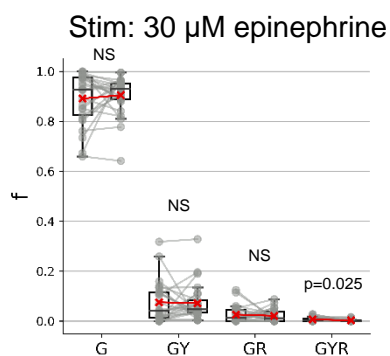

**C. GPCR: G-ADRA2A**

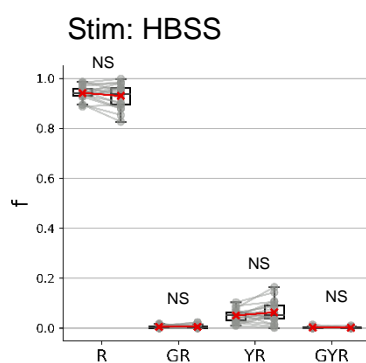

**D. GPCR: G-ADRA2A**

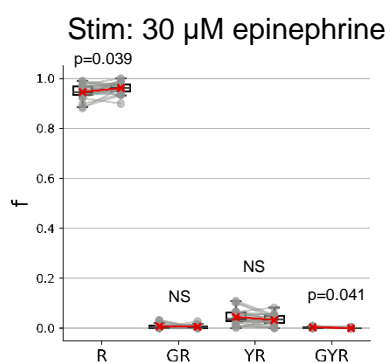

FIGURE S4. Fractional distributions of G-ADRA2A and R-GNB1/R-GNG2 among oligomer states determined by covariance matrix analysis (corresponds with data in Figure 3 C-D). For each state, the left column contains the pre-stimulus fraction, and the right column contains the post-stimulus fraction. A) Fractional oligomer distribution of G-ADRA2A stimulated with HBSS (negative control). B) Distribution of G-ADRA2A stimulated with 30  $\mu$ M epinephrine. C) Distribution of R-GNB1/R-GNG2 stimulated with HBSS (negative control). D) Distribution of R-GNB1/R-GNG2 stimulated with 30  $\mu$ M epinephrine. P-values are the results of two-sided paired t-tests. NS denotes  $p > 0.05$ .

Table S1. Primers for subcloning experiments.

| Forward Primer (5'→3')                      | Reverse Primer (5'→3')                            | Purpose                                                                                                                                                      |
|---------------------------------------------|---------------------------------------------------|--------------------------------------------------------------------------------------------------------------------------------------------------------------|
| TAAAGCGGCCGCGACTCTAG                        | AGTAGCGACCGGGGTTGC                                | Linearize CD86-EGFP about EGFP coding region for FP swaps against EGFP                                                                                       |
| ACCCGGTCTGCTACTATGGTGA<br>GCAAGGGCGAGG      | GTCGCGCCGCTTTACTTGTA<br>CAGCTCGTCCATGCC           | Amplification of mEGFP, mEYFP(Q69K) or mCherry2 for insertion against EGFP in CD86-EGFP to create CD86-G, CD86-Y, CD86-R                                     |
| TCCGGAATGGCCCTCTG                           | GGTGGCGACCGGAATCTTC                               | Linearize EGFP-CD86-mApple about EGFP coding region for swaps against mApple                                                                                 |
| TGAAGATCCGGTTCGCCACCAT<br>GGTGAGCAAGGGCGAGG | TTCAGAGGGGCCATTCCGGA<br>CTTGACAGCTCGTCCATGCC      | Amplification of mCherry2 for insertion against EGFP in EGFP-CD86-mApple. One step in creating R-CD86-G and R-CD86-Y.                                        |
| TTCGCTGCGCTGCTGGCAAC                        | TCCCTCCCACTGGGGCAC                                | Linearize CD86-G or R-CD86-G about position in C-terminal linker region for insertion of an additional FP coding region                                      |
| CCCCAGTGGGAGGAATGGTG<br>AGCAAGGGCGAGG       | CAGCAGCGCAGCGAACTTGT<br>ACAGCTCGTCCATGCC          | Amplification of mEYFP(Q69K) for insertion into C-terminal linker region of CD86-G or R-CD86-G to create CD86-Y-G or R-CD86-Y-G                              |
| CGTCAGATCCGCTAGCGCTACC<br>GGTCGCCACCA       | TGGGAGTAAGTCATGAGCTC<br>CTGGTCAGCACGAA            | Amplification of R-GNB1 for insertion into GNB1-T2A-R-GNG2-IRES-GNAI1-Y linearized by digestion with NheI and SacI to produce R-GNB1-T2A-R-GNG2-IRES-GNAI1-Y |
| TCCGACTCAGATCTATGGCCA                       | ACCGGTAGGGCCGGGATT                                | Linearize R-GNB1-T2A-cpVenus-GNG2-IRES-GNAI1-mTurquoise2 about cpVenus                                                                                       |
| AATCCCGGCCCTACCGGTATG<br>GTGAGCAAGGGCGAGG   | CATAGATCTGAGTCCGGACTT<br>GTACAGCTCGTCCATGCC       | Amplify for insertion against cpVenus in R-GNB1-T2A-cpVenus-GNG2-IRES-GNAI1-mTurquoise2 to create R-GNB1-T2A-R-GNG2-IRES-GNAI1-mTurquoise2                   |
| TTATGACCGCGACCGTTCTAT<br>GGTGAGCAAGGGCGAGG  | ATGACGCCGGCGAGTTCACC<br>AGTGATCCCGGCGCGGTCA<br>CG | Amplification of mEYFP(Q69K) for insertion into GNAI1-mTurquoise2 linearized by AgeI digestion against mTurquoise2                                           |
| GAGCACCCAGTCCAAGCTGAG<br>CAAAGAC            | AGGTAGTGGTTGTCGGGCAG<br>CAGC                      | Introduce A206K mutation into EGFP in EGFP-DRD2 to create G-DRD2                                                                                             |
| TGACTCTGCTGCCTGCC                           | GTACAGCTCGTCCATGCCG                               | Linearize G-DRD2 about DRD2                                                                                                                                  |
| GGCATGGACGAGCTGTACATG<br>TTCCGGCAGGAGCAGC   | GGGCAGGCAGCAGAGTCAAA<br>CGATTCTTCTATCGCCTC        | Amplify ADRA2A for insertion against DRD2 in G-DRD2 to create G-ADRA2A                                                                                       |
